# Supplementary material for: Single molecule analysis of effects of non-canonical guide RNAs and specificity-enhancing mutations on Cas9-induced DNA unwinding
Source: PubMed Central journal article supplement (PMC7145707; doi:10.1093/nar/gkz1058), 2019-11-12
Supplement: gkz1058_supplemental_file.pdf [file gkz1058_supplemental_file.pdf]

Supplementary Information for

# Single molecule analysis of effects of non-canonical guide RNAs and specificity-enhancing mutations on Cas9-induced DNA unwinding

Ikenna C. Okafor<sup>1,\*</sup>, Digvijay Singh<sup>2,#,\*</sup>, Yanbo Wang<sup>2,\*</sup>, Minhee Jung<sup>3</sup>, Haobo Wang<sup>4</sup>, John Mallon<sup>4</sup>,  
Scott Bailey<sup>2,4</sup>, Jungjoon K. Lee<sup>3</sup> and Taekjip Ha<sup>2,5-7,@</sup>

<sup>1</sup>Department of Biology, Johns Hopkins University, Baltimore, Maryland 21218, USA

<sup>2</sup>Department of Biophysics and Biophysical Chemistry, Johns Hopkins University School of Medicine,  
Baltimore, Maryland 21205, USA.

<sup>3</sup>Toolgen, Seoul 08501, Republic of Korea.

<sup>4</sup>Bloomberg School of Public Health, Johns Hopkins University School of Medicine, Baltimore, Maryland  
21205, USA.

<sup>5</sup>Department of Biophysics, Johns Hopkins University, Baltimore, MD 21218, USA.

<sup>6</sup>Department of Biomedical Engineering, Johns Hopkins University, Baltimore, Maryland 21205, USA.

<sup>7</sup>Howard Hughes Medical Institute, Baltimore, Maryland 21205, USA.

<sup>#</sup>Present address: Division of Biological Sciences, University of California San Diego, La Jolla, California, 7  
USA, 92095-0377.

<sup>@</sup>To whom correspondence should be addressed: Taekjip Ha (tjha@jhu.edu)

<sup>\*</sup>These authors are co-first authors.

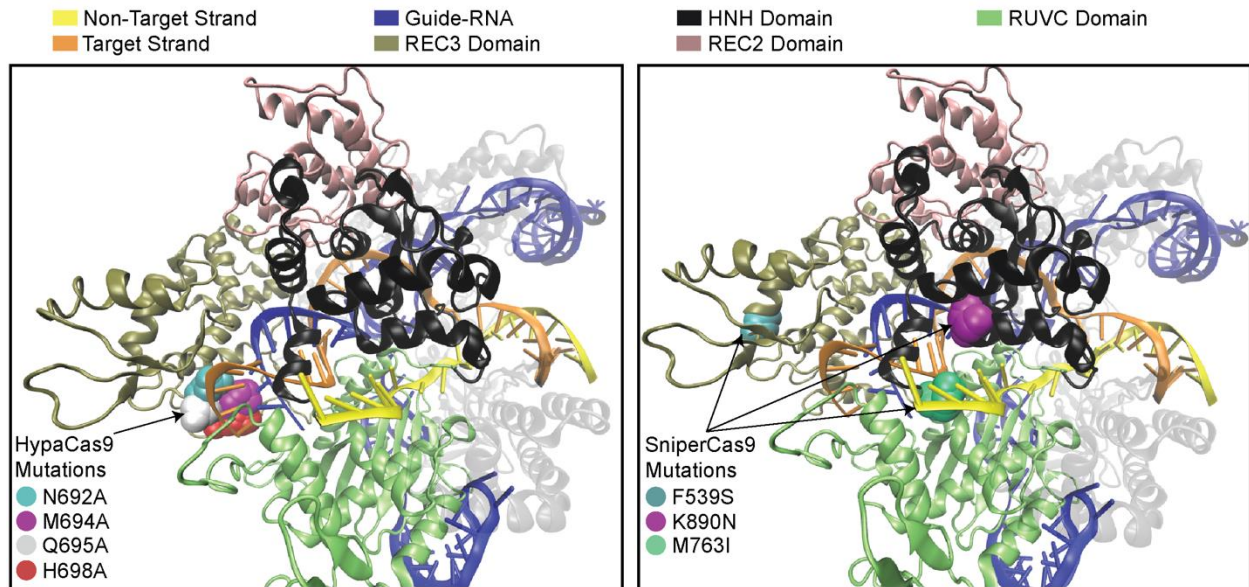

**Figure S1. Locations of HypaCas9 and SniperCas9 mutations in the Cas9-RNA-DNA. (PDB ID: 5F9R(1)).**

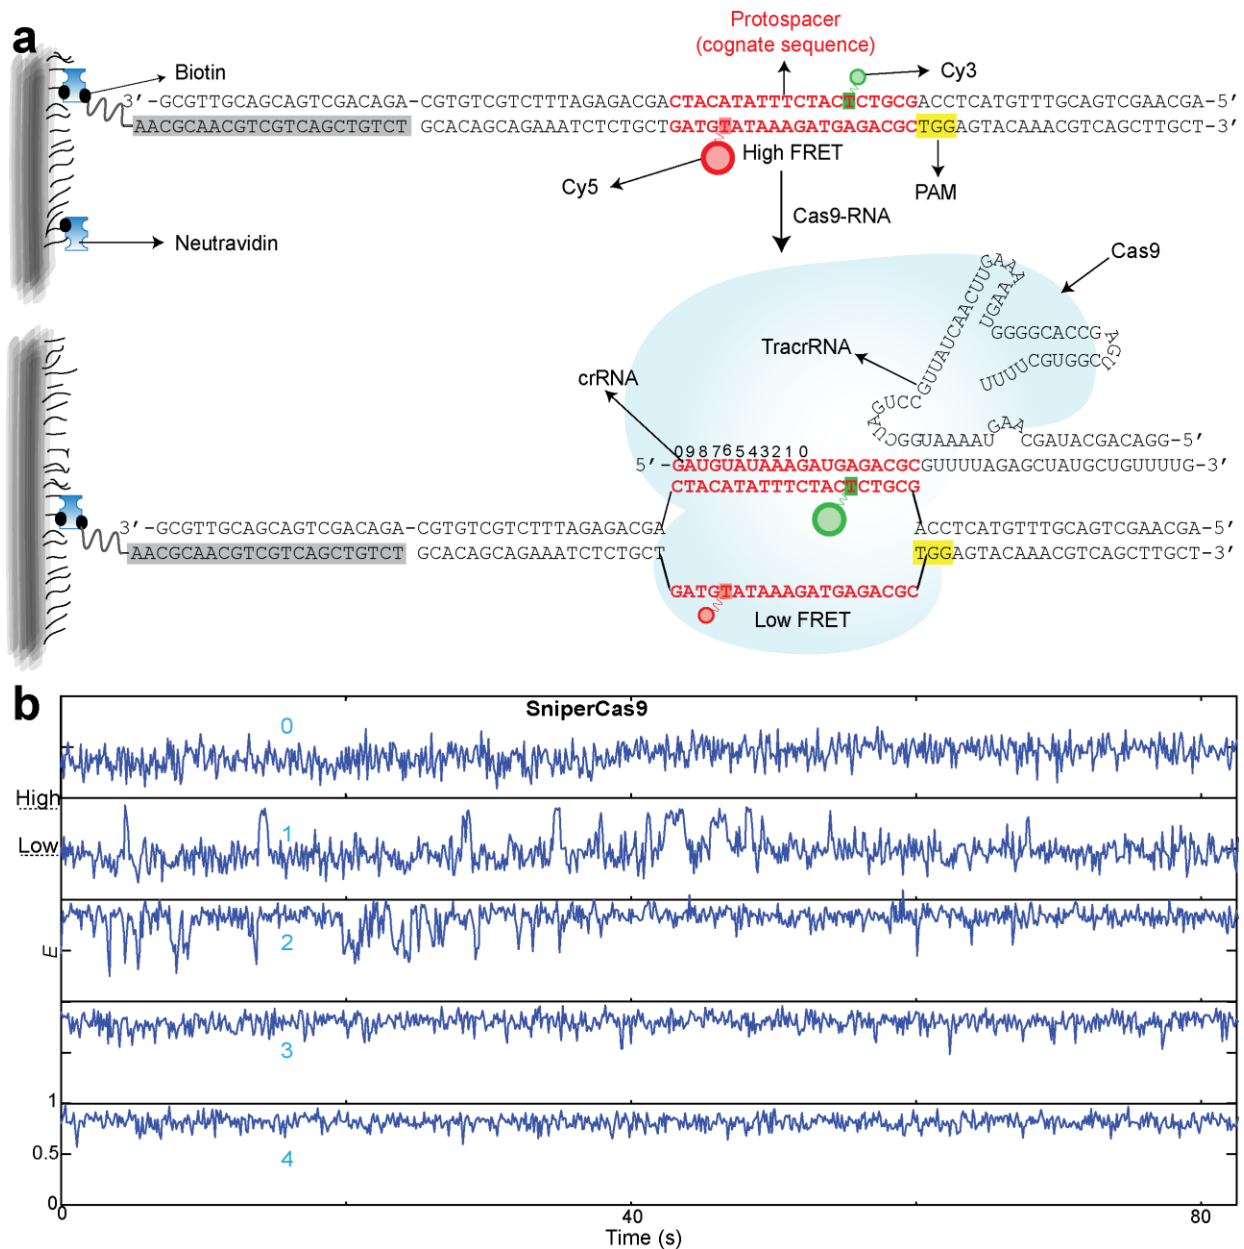

**Figure S2. Locations of FRET probes for smFRET DNA unwinding experiments and *E* time-traces of DNA unwinding by SniperCas9-X20. (a)** Schematic of Cas9-RNA-DNA complex. crRNA hybridized with tracrRNA is the guide-RNA, and the denoted red sequences hybridize with one of the strands (target strand) in the DNA. The strand complementary to target strand in the DNA is the non-target strand which also contains the PAM (5'-NGG-3') as indicated. Highlighted in grey is a 22 nt biotin-labeled strand which is used as an adaptor for surface immobilization of the DNA. The donor and acceptor labels are conjugated to the 6<sup>th</sup> nucleotide (from PAM) in target strand and 16<sup>th</sup> in the non-target strand. Cas9-RNA binds the DNA leading to the unwinding of the DNA which results in an increase in distance between FRET labels and thus a

decrease in  $E$ . **(b)** Representative  $E$  time-traces of DNA unwinding by SniperCas9-X20 for different DNA targets.

**a**

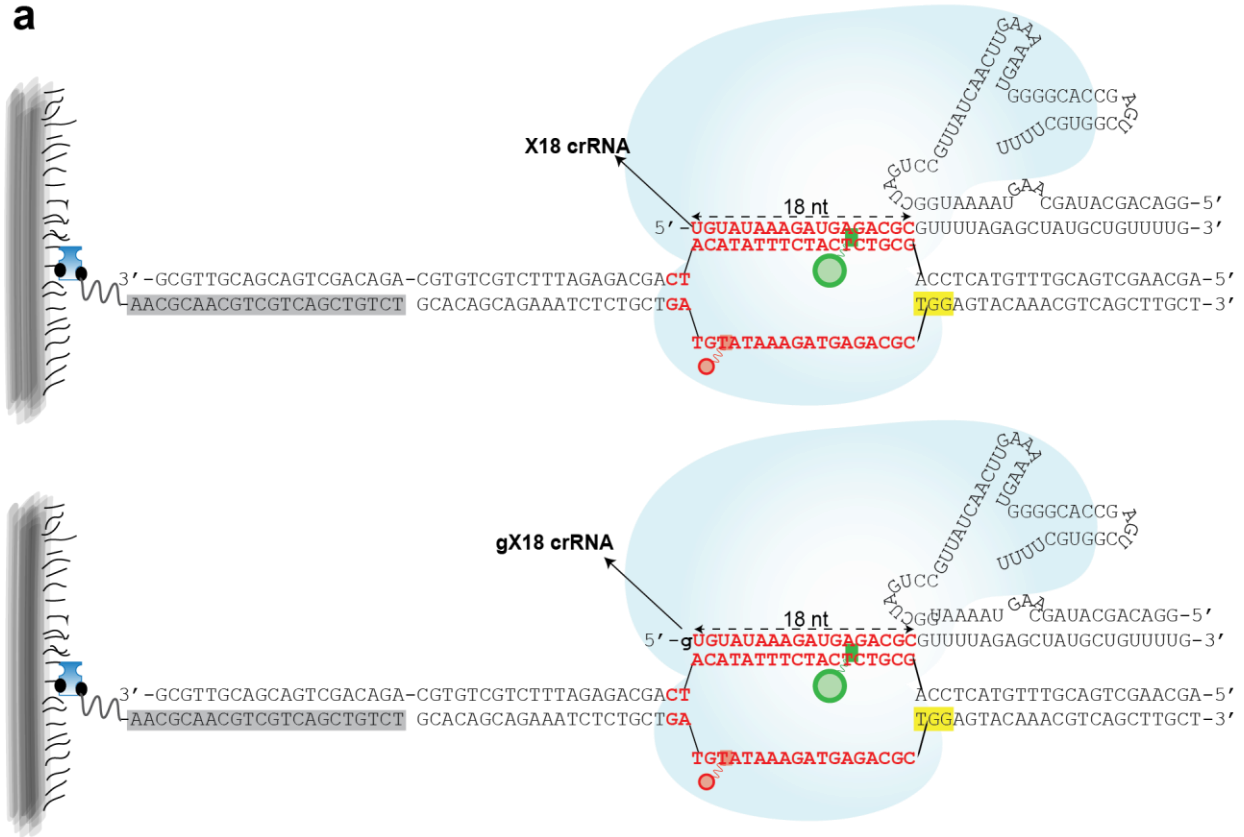

**b**

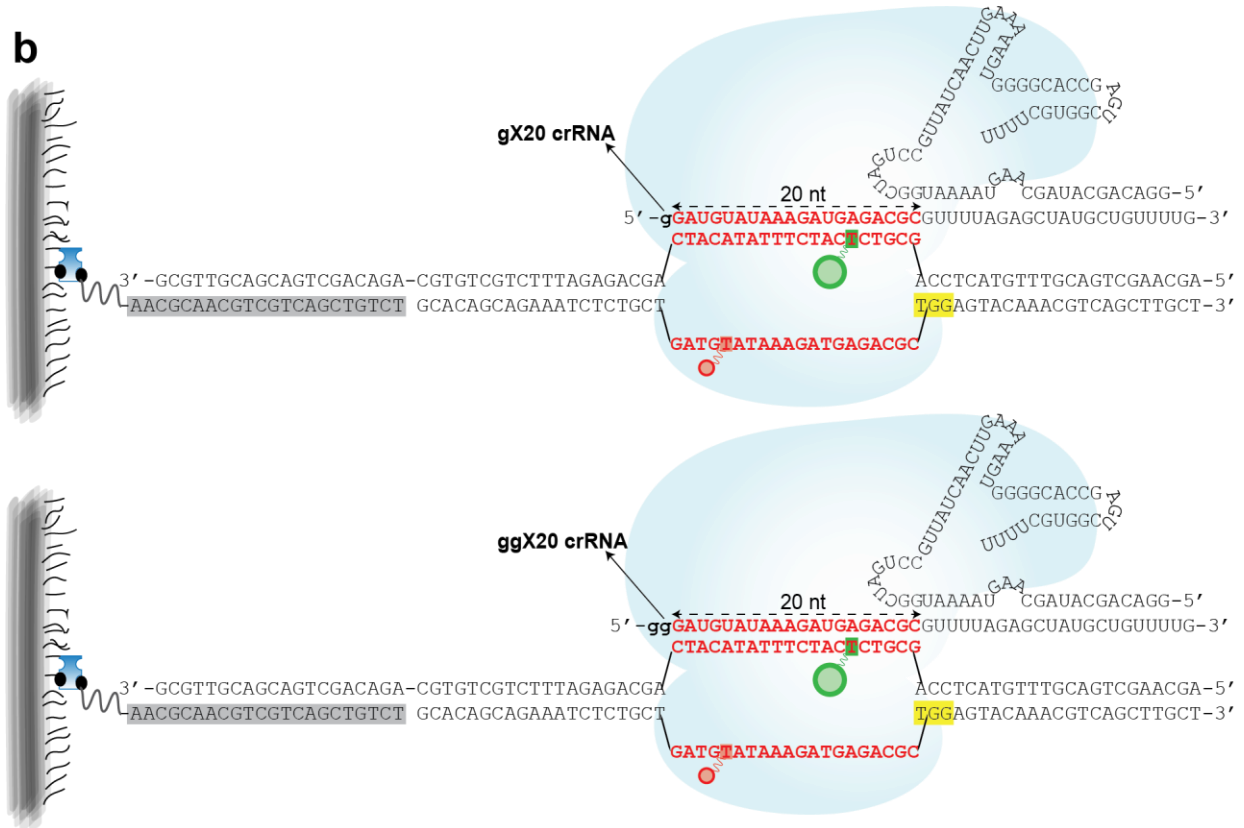

**Figure S3. Schematic of the smFRET unwinding assay involving non-canonical gRNAs.**  
(a) Extended gRNAs. (b) Truncated gRNAs.

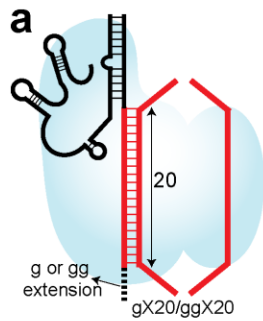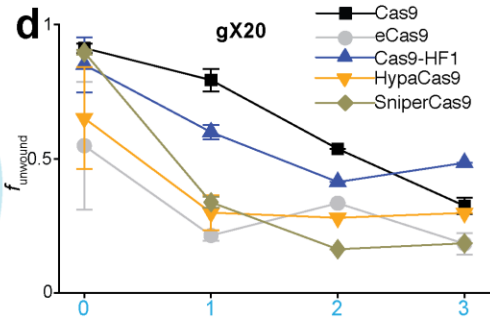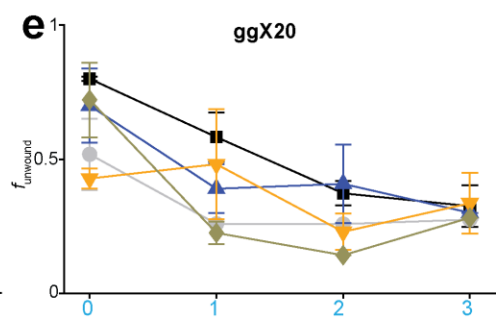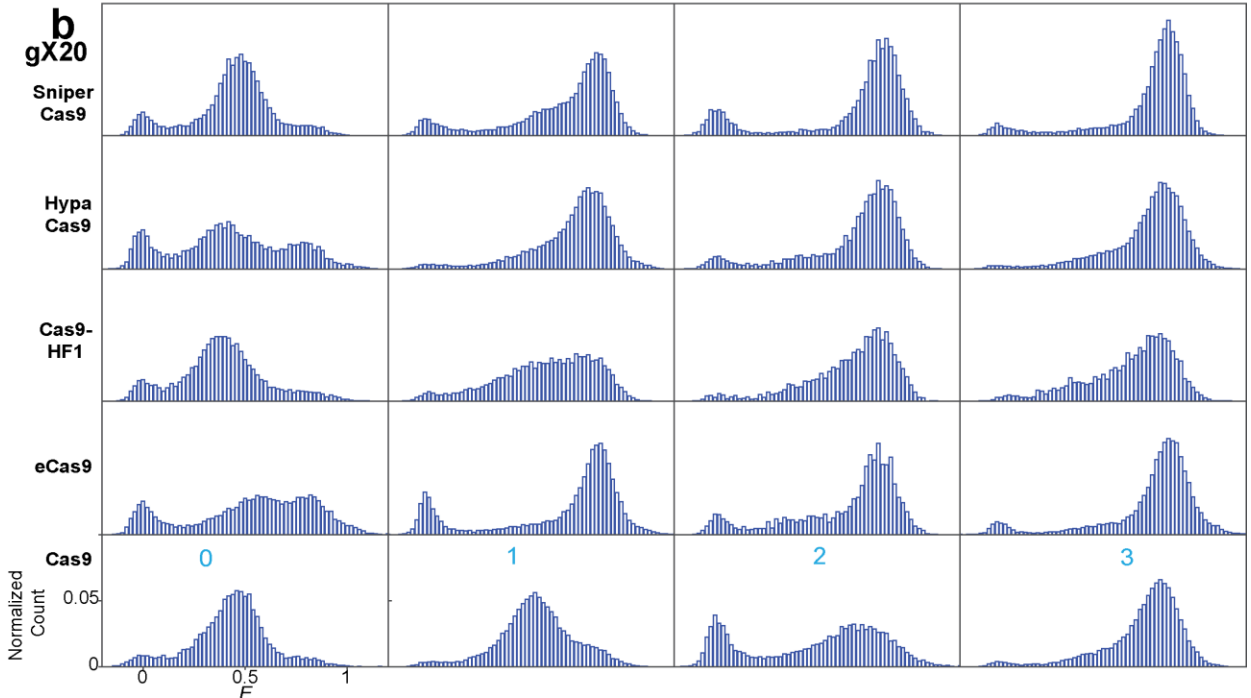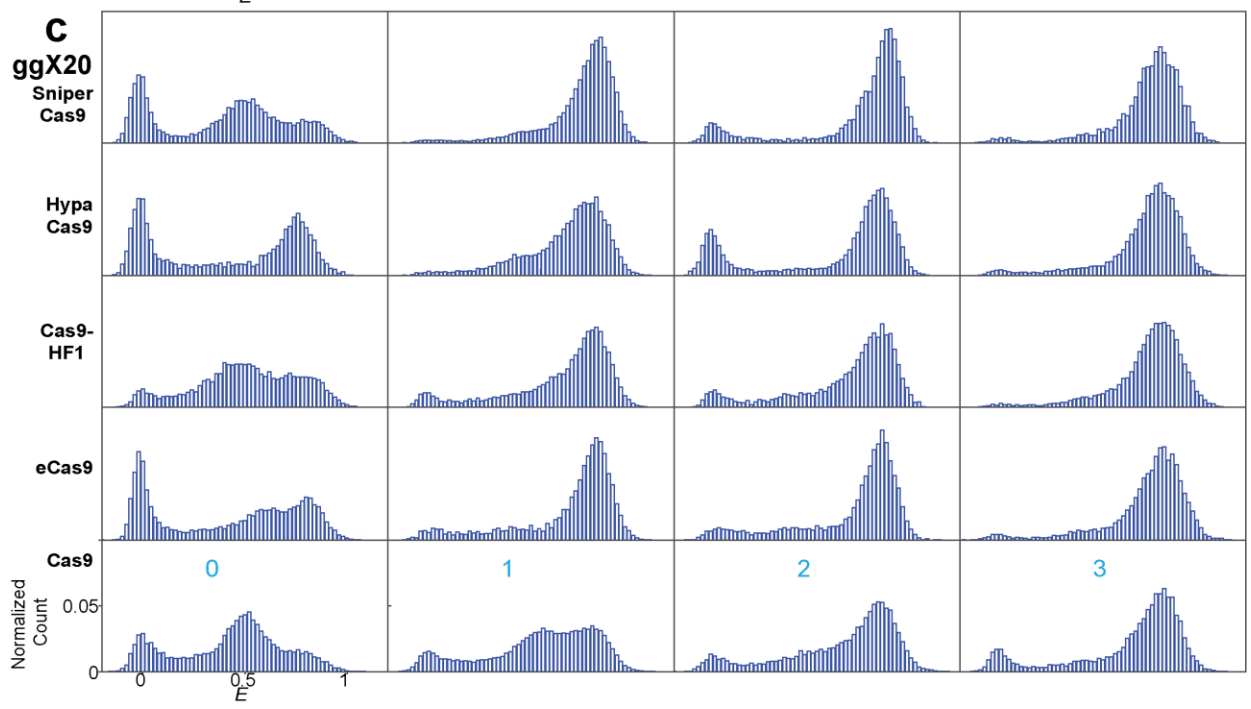

**Figure S4. Unwinding by extended gRNA.**

(a) Schematic and naming convention of extended gRNA used in the unwinding assay. gX20 or ggX20 are gRNA with 5'g and 5' gg non-hybridizing extensions respectively with canonical lengths of 20 bp in target strand hybridizing region. (b-c)  $E$  histograms of unwinding by extended gRNA. Each row corresponds to a particular labeled Cas9. Each column corresponds to a particular DNA target. (b) Histograms by gX20. (c) Histograms by ggX20. (d)  $f_{\text{unwound}}$  vs.  $n_{\text{PD}}$  for different Cas9s with gX20. (e)  $f_{\text{unwound}}$  vs.  $n_{\text{PD}}$  for different Cas9s with ggX20.



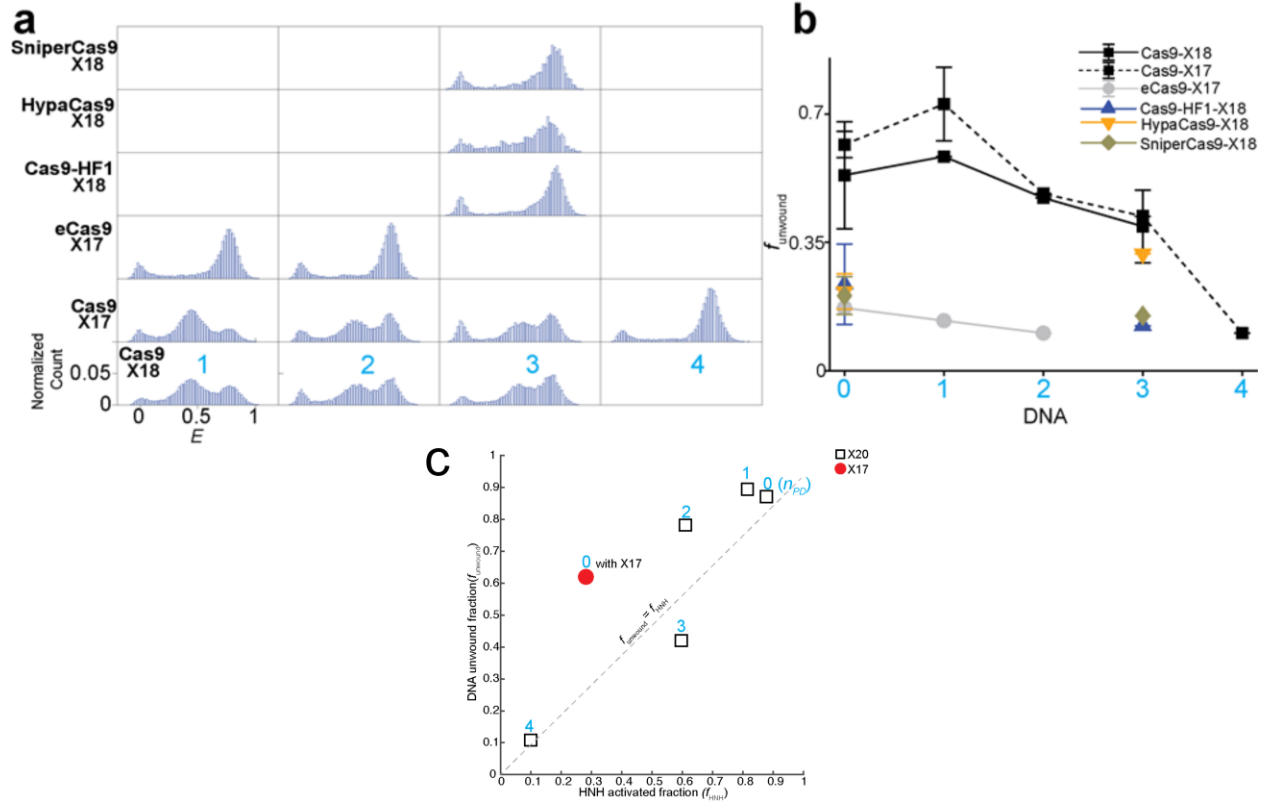

**Figure S5. Unwinding by truncated gRNA.**

**(a)**  $E$  histograms of unwinding by truncated gRNA. Each row corresponds to a particular labeled Cas9 and gRNA combination. Each column corresponds to a particular DNA target. **(b)**  $f_{\text{unwound}}$  vs.  $n_{PD}$  for different Cas9s with truncated gRNAs. **(c)**  $f_{\text{unwound}}$  vs.  $f_{\text{HNH}}$  activation for X20 and X17 (Red) for DNA targets with different  $n_{PD}$

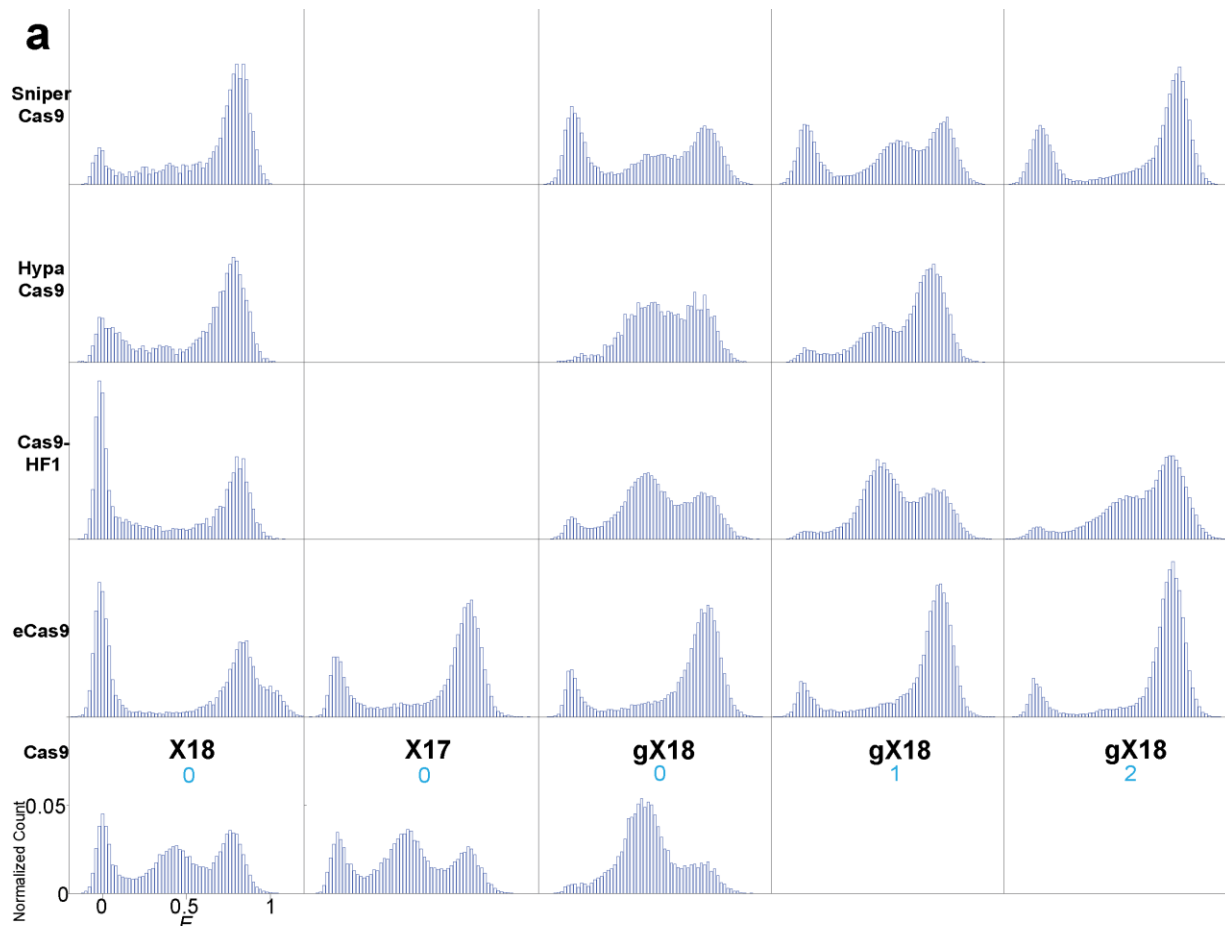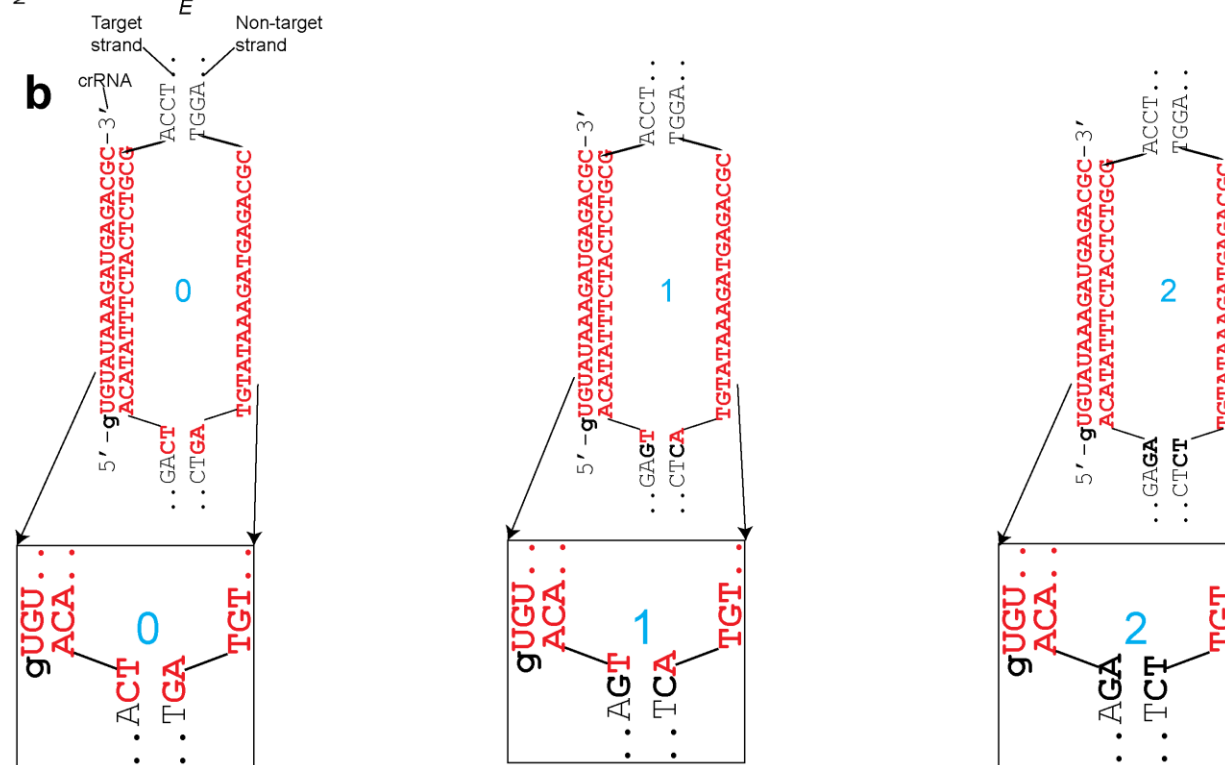

**Figure S6. Unwinding by truncated gRNA.**

**(a)**  $E$  histograms of unwinding by truncated gRNA. Each row corresponds to a particular labeled Cas9. Each column corresponds to a particular gRNA and DNA target. **(b)** Sequences of DNA and crRNA (of truncated gRNAs). X18/gX18 guide RNA forms the same Watson-Crick base pairing with  $n_{PD}=0$ ,  $n_{PD}=1$ , and  $n_{PD}=2$  DNA targets.

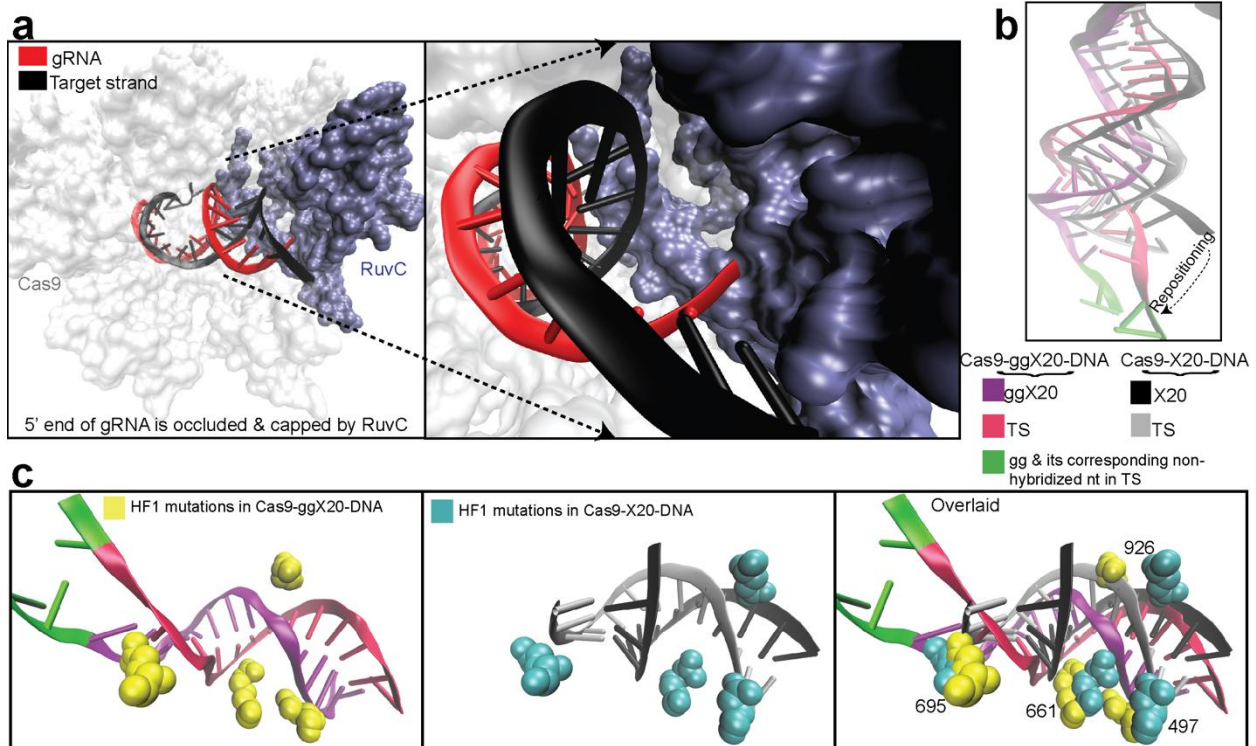

**Figure S7. PAM distal end of Cas9-RNA-DNA complex.**

**(a)** 5' end of the gRNA is occluded and capped by the RuvC nuclease domain in Cas9-X20-DNA. PDB ID: 5F9R(1). **(b)** The gRNA and target strand of Cas9-ggX20-DNA and Cas9-X20-DNA after aligning the residues of Cas9 between the two structures (Cas9-ggX20-DNA; PDB ID: 5Y36(2) and Cas9-X20-DNA; PDB ID: 5F9R(1)). With the extensions, the RNA-DNA hybrid at the PAM-distal end has been considerably repositioned, compared with its position with the canonical gRNA. The 21<sup>st</sup> and 22<sup>nd</sup> nucleotide, counting from PAM, of the target strand are not base-paired with the non-target strand nucleotides, but are rather flipped towards the gg of the ggX20. **(c)** The relative changes in positions of RNA-DNA hybrid and Cas9-HF1 mutations between Cas9-X20-DNA and Cas9-ggX20-DNA.

**Table S1: gRNA and DNA targets used for Cas9-RNA induced DNA unwinding smFRET assay.**

| DNA                   | Sequences                                                                                                                                                                                                                                                     |
|-----------------------|---------------------------------------------------------------------------------------------------------------------------------------------------------------------------------------------------------------------------------------------------------------|
| 0/0                   | 20 nucleotide biotinylated adaptor for surface immobilization<br>5' -* -AACGCAACGTCGTCAGCTGTCT GCACAGCAGAAATCTCTGCTGATGATAAAAGATGAGACCGTGGAGTACAAACGTCAGCTTGCT-3'<br>3' -GCGTTGCAGCAGTCGACAGA-CGTGTCGTCTTTAGAGACGACTACATATTTCTACTGCGACCTCATGTTGCAGTCGAACGA-5' |
| 1                     | 5' -* -AACGCAACGTCGTCAGCTGTCT GCACAGCAGAAATCTCTGCTCATGATAAAAGATGAGACCGTGGAGTACAAACGTCAGCTTGCT-3'<br>3' -GCGTTGCAGCAGTCGACAGA-CGTGTCGTCTTTAGAGACGAGTACATATTTCTACTGCGACCTCATGTTGCAGTCGAACGA-5'                                                                  |
| 2                     | 5' -* -AACGCAACGTCGTCAGCTGTCT GCACAGCAGAAATCTCTGCTCTGATAAAAGATGAGACCGTGGAGTACAAACGTCAGCTTGCT-3'<br>3' -GCGTTGCAGCAGTCGACAGA-CGTGTCGTCTTTAGAGACGAGAACATATTTCTACTGCGACCTCATGTTGCAGTCGAACGA-5'                                                                   |
| 3                     | 5' -* -AACGCAACGTCGTCAGCTGTCT GCACAGCAGAAATCTCTGCTCTAGATAAAAGATGAGACCGTGGAGTACAAACGTCAGCTTGCT-3'<br>3' -GCGTTGCAGCAGTCGACAGA-CGTGTCGTCTTTAGAGACGAGATCATATTTCTACTGCGACCTCATGTTGCAGTCGAACGA-5'                                                                  |
| 4                     | 5' -* -AACGCAACGTCGTCAGCTGTCT GCACAGCAGAAATCTCTGCTCTACTATAAAAGATGAGACCGTGGAGTACAAACGTCAGCTTGCT-3'<br>3' -GCGTTGCAGCAGTCGACAGA-CGTGTCGTCTTTAGAGACGAGATGATATTTCTACTGCGACCTCATGTTGCAGTCGAACGA-5'                                                                 |
| RNA                   | Sequences                                                                                                                                                                                                                                                     |
| Canonical crRNA (X20) | 5' -GAUGUAUAAAGAUGAGACGCGUUUUUAGAGCUAUGCUGUUUUUG-3'                                                                                                                                                                                                           |
| X17 crRNA             | 5' -GUAUAAAGAUGAGACGCGUUUUUAGAGCUAUGCUGUUUUUG-3'                                                                                                                                                                                                              |
| X18 crRNA             | 5' -UGUAUAAAGAUGAGACGCGUUUUUAGAGCUAUGCUGUUUUUG-3'                                                                                                                                                                                                             |
| gX20 crRNA            | 5' -gGAUGUAUAAAGAUGAGACGCGUUUUUAGAGCUAUGCUGUUUUUG-3'                                                                                                                                                                                                          |
| ggX20 crRNA           | 5' -ggGAUGUAUAAAGAUGAGACGCGUUUUUAGAGCUAUGCUGUUUUUG-3'                                                                                                                                                                                                         |
| gX18 crRNA            | 5' -gUGUAUAAAGAUGAGACGCGUUUUUAGAGCUAUGCUGUUUUUG-3'                                                                                                                                                                                                            |
| tracrRNA              | 5' -GGACAGCAUAGCAAGUUAAAAUAAAGGCUAGUCCGUUAUCAACUUAAAAAGUGGCACCGAGUCGGUGCUUUUUU-3'                                                                                                                                                                             |

Thymine modification for **Cy3** and **Cy5** labeling. \*Biotin. **PAM**. DNA sequences complementary to guide RNA are shown in red (Cognate). RNA sequences complementary to the protospacer in a cognate DNA target are shown in red (Cognate).

## REFERENCES

1. Jiang, F., Taylor, D.W., Chen, J.S., Kornfeld, J.E., Zhou, K., Thompson, A.J., Nogales, E. and Doudna, J.A. (2016) Structures of a CRISPR-Cas9 R-loop complex primed for DNA cleavage. *Science*, **351**, 867–71.
2. Huai, C., Li, G., Yao, R., Zhang, Y., Cao, M., Kong, L., Jia, C., Yuan, H., Chen, H., Lu, D., *et al.* (2017) Structural insights into DNA cleavage activation of CRISPR-Cas9 system. *Nat. Commun.*, **8**, 1375.
